# Supplementary material for: Purification, Characterization and Comparison between Two New L-asparaginases from Bacillus PG03 and Bacillus PG04
Source: PubMed Central journal article supplement — Open Biochem J. 2016 Nov 4;10:35–45. doi: 10.2174/1874091X01610010035 (PMC5144114; doi:10.2174/1874091x01610010035), 2016-11-04
Supplement: TOBIOCJ-10-35_SD-1.pdf [file TOBIOCJ-10-35_SD-1.pdf]

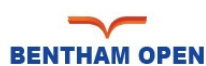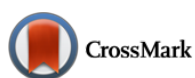

# The Open Biochemistry Journal

## Supplementary Material

Content list available at: [www.benthamopen.com/TOBIOCI/](http://www.benthamopen.com/TOBIOCI/)

DOI: 10.2174/1874091X01610010027

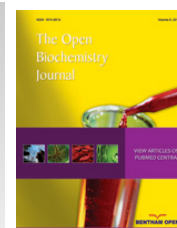

## RESEARCH ARTICLE

## Purification, Characterization and Comparison between Two New L-asparaginases from *Bacillus* PG03 and *Bacillus* PG04

Mahsa Rahimzadeh<sup>\*,1,4</sup>, Manijeh Poodat<sup>2</sup>, Sedigheh Javadvpour<sup>3</sup>, Fatemeh Izadpanah Qeshmi<sup>4</sup> and Fereshteh Shamsipour<sup>5</sup>

<sup>1</sup>Molecular Medicine Research Center, Department of Biochemistry, Faculty of Medicine, Hormozgan University of Medical Sciences, Bandar Abbas, Iran

<sup>2</sup>Department of Biochemistry, Faculty of Sciences, Payame Noor University of Mashhad, Mashhad, Iran

<sup>3</sup>Molecular Medicine Research Center, Department of Microbiology, Faculty of Medicine, Hormozgan University of Medical Sciences, Bandar Abbas, Iran

<sup>4</sup>Food and Cosmetic Health Research Center, Department of Biochemistry, Faculty of Medicine, Hormozgan University of Medical Sciences, Bandar Abbas, Iran

<sup>5</sup>Monoclonal Antibody Research Center, Avicenna Research Institute, (ACECR), Tehran, Iran

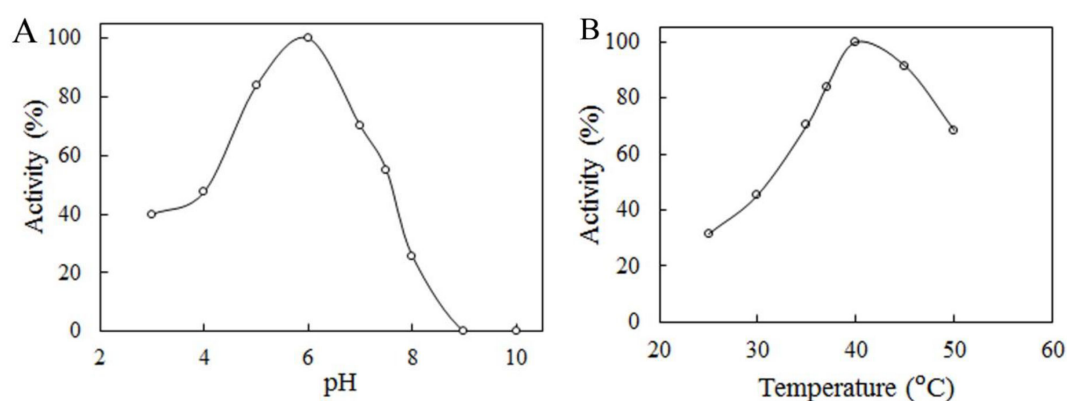

Fig. (1). (A) Effect of pH and (B) temperature on activity of L- asparaginase from *E. coli*.

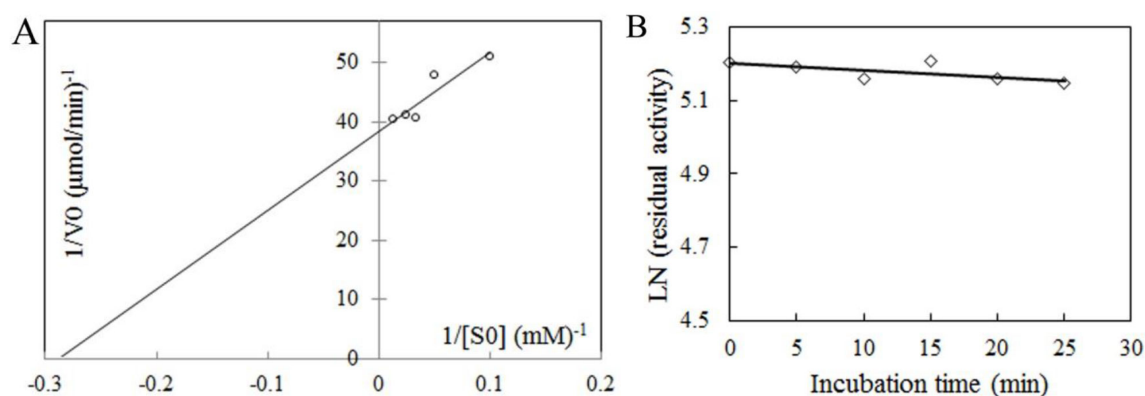

Fig. (2). (A) Lineweaver-Burk plots and (B) half-life curve of L-asparaginase from *E. coli*.
